# Supplementary material for: Watershed analysis of the target pulmonary artery for real-time localization of non-palpable pulmonary nodules
Source: PubMed Central journal article supplement — Transl Lung Cancer Res. 2021 Apr;10(4):1711–9. doi: 10.21037/tlcr-20-1281 (PMC8107747; doi:10.21037/tlcr-20-1281), 2021-04
Supplement: tlcr-10-04-1711-dss.pdf [file tlcr-10-04-1711-dss.pdf]

## Data Sharing Statement

|                     |                                                                                                                                                     |                                                                                                                                                    |
|---------------------|-----------------------------------------------------------------------------------------------------------------------------------------------------|----------------------------------------------------------------------------------------------------------------------------------------------------|
| <b>Article Info</b> | <a href="http://dx.doi.org/10.21037/tlcr-20-1281">http://dx.doi.org/10.21037/tlcr-20-1281</a>                                                       |                                                                                                                                                    |
| <b>Item</b>         | <b>Question</b>                                                                                                                                     | <b>Authors' Response<br/>(place "-" if not applicable)</b>                                                                                         |
| 1                   | Would you like to share data collected for your study to others?                                                                                    | Yes                                                                                                                                                |
| 2                   | If not, would you like to share the reason for your decision?                                                                                       | -                                                                                                                                                  |
| 3                   | What data in particular will be shared?                                                                                                             | The materials and methods used in our new technology in particular will be shared.                                                                 |
| 4                   | Any other documents will be shared? Such as study protocol, statistical analysis plan, informed consent form, clinical study report, analytic code. | Statistical analysis plan, informed consent form, and clinical study report will also be shared if requested.                                      |
| 5                   | When will data availability begin?                                                                                                                  | From the publication date.                                                                                                                         |
| 6                   | When will data availability end?                                                                                                                    | Two years within the publication date, since the technique may be updated over time.                                                               |
| 7                   | To whom will you share the data?                                                                                                                    | Medical oncologists and thoracic surgeons who are interested in studies of localization of pulmonary nodules.                                      |
| 8                   | For what type of analysis or purpose?                                                                                                               | For analysis to evaluate the safety and feasibility of "Watershed analysis for localization of pulmonary nodules".                                 |
| 9                   | How or where can the data/documents be obtained?                                                                                                    | Emails could be sent to the address below to obtain the shared data:<br><a href="mailto:syzhongwenzhao@scut.edu.cn">syzhongwenzhao@scut.edu.cn</a> |
| 10                  | Any other restrictions?                                                                                                                             | We may balance the potential benefits and risks for each request and then provide the data that could be shared.                                   |
